# Supplementary material
Source: PubMed Central journal article supplement (PMC2660599)
Supplement: NIHMS94402-supplement-supplement_1.pdf [file NIHMS94402-supplement-supplement_1.pdf]

| Protein  | #  | Ligands                      | Seq. Ident. | Rel. Ident. | Hs Ident. | Vol. (Å <sup>3</sup> ) | Area (Å <sup>2</sup> ) | Res. (Å) | Score |
|----------|----|------------------------------|-------------|-------------|-----------|------------------------|------------------------|----------|-------|
| PNP      | 1  | inhibitor (IMH)              | 1.00        | 1.25        | 0.56      | 590                    | 513                    | 2.20     | -2.95 |
| PNP      | 2  |                              | 1.00        | 1.25        | 0.50      | 274                    | 290                    | 2.20     | -2.56 |
| LDH      | 1  |                              | 1.00        | 1.07        | 0.56      | 466                    | 406                    | 1.70     | -2.49 |
| ENR*     | 1  | inhibitor (TCC)              | 1.00        | 1.17        | 0.57      | 410                    | 362                    | 2.35     | -2.47 |
| TIM      | 1  |                              | 0.94        | 1.17        | 0.81      | 448                    | 407                    | 1.10     | -2.45 |
| DHFR-TS* | 3  | inhibitor (WRA)              | 1.00        | 1.25        | 0.79      | 432                    | 375                    | 2.33     | -2.35 |
| HGXPRT   | 3  |                              | 1.00        | 1.25        | 0.75      | 269                    | 323                    | 2.00     | -2.29 |
| PNP      | 3  |                              | 1.00        | 1.25        | 0.50      | 174                    | 323                    | 2.20     | -2.18 |
| PM2      | 1  | inhibitor (R37)              | 0.88        | 1.28        | 0.80      | 518                    | 485                    | 1.80     | -2.15 |
| AdSS     | 3  | product (GDP)                | 0.95        | 1.23        | 0.82      | 396                    | 442                    | 2.00     | -2.06 |
| LDH      | 2  | inhibitor (OXQ), cofactor    | 1.00        | 1.07        | 0.76      | 420                    | 390                    | 1.70     | -1.88 |
| KinI     | 2  |                              | 1.00        | 1.10        | 0.65      | 263                    | 297                    | 1.60     | -1.83 |
| AdSS     | 2  |                              | 0.94        | 1.22        | 0.83      | 469                    | 348                    | 2.00     | -1.65 |
| GR       | 4  |                              | 1.00        | 1.16        | 0.71      | 269                    | 416                    | 2.60     | -1.57 |
| ENR*     | 2  |                              | 0.94        | 1.10        | 0.63      | 381                    | 412                    | 2.35     | -1.57 |
| ENR*     | 3  |                              | 1.00        | 1.17        | 0.64      | 232                    | 298                    | 2.35     | -1.56 |
| KinI     | 1  |                              | 1.00        | 1.10        | 0.85      | 442                    | 464                    | 1.60     | -1.54 |
| ACBP     | 1  | payload (COA), payload (MYR) | 0.85        | 1.22        | 0.77      | 318                    | 367                    | 2.00     | -1.41 |
| DHFR-TS* | 7  |                              | 1.00        | 1.25        | 0.69      | 210                    | 210                    | 2.33     | -1.36 |
| ENR      | 2  |                              | 0.94        | 1.10        | 0.63      | 295                    | 355                    | 2.35     | -1.23 |
| DHFR-TS  | 6  |                              | 1.00        | 1.25        | 0.69      | 197                    | 201                    | 2.33     | -1.22 |
| DHFR-TS* | 6  |                              | 0.95        | 1.20        | 0.73      | 216                    | 315                    | 2.33     | -1.20 |
| GR*      | 3  |                              | 0.96        | 1.12        | 0.79      | 452                    | 442                    | 2.60     | -1.15 |
| AdSS     | 6  |                              | 1.00        | 1.29        | 0.67      | 142                    | 159                    | 2.00     | -1.10 |
| GR       | 3  |                              | 0.96        | 1.11        | 0.75      | 374                    | 356                    | 2.60     | -1.06 |
| GST      | 3  |                              | 1.00        | 1.17        | 0.50      | 183                    | 201                    | 2.20     | -1.04 |
| ENR*     | 4  |                              | 1.00        | 1.17        | 0.56      | 170                    | 230                    | 2.35     | -0.97 |
| AdSS     | 1  |                              | 0.83        | 1.08        | 0.67      | 488                    | 541                    | 2.00     | -0.92 |
| PM2      | 3  |                              | 0.90        | 1.32        | 0.60      | 123                    | 149                    | 1.80     | -0.73 |
| DHFR-TS* | 4  |                              | 0.88        | 1.10        | 0.56      | 283                    | 293                    | 2.33     | -0.68 |
| LDH      | 4  |                              | 1.00        | 1.07        | 0.64      | 171                    | 222                    | 1.70     | -0.67 |
| DHFR-TS  | 4  |                              | 0.88        | 1.10        | 0.56      | 263                    | 279                    | 2.33     | -0.53 |
| ENR      | 3  |                              | 1.00        | 1.17        | 0.75      | 174                    | 227                    | 2.35     | -0.49 |
| ENR      | 4  |                              | 1.00        | 1.17        | 0.50      | 120                    | 188                    | 2.35     | -0.40 |
| PK5      | 3  |                              | 1.00        | 1.10        | 0.50      | 156                    | 167                    | 1.90     | -0.39 |
| CyP      | 2  |                              | 1.00        | 1.10        | 0.75      | 185                    | 223                    | 2.10     | -0.27 |
| DHFR-TS* | 8  |                              | 0.89        | 1.11        | 0.61      | 194                    | 264                    | 2.33     | -0.21 |
| ENR*     | 6  |                              | 1.00        | 1.17        | 0.50      | 124                    | 160                    | 2.35     | -0.19 |
| GR*      | 2  |                              | 0.96        | 1.11        | 0.75      | 518                    | 712                    | 2.60     | -0.19 |
| DHFR-TS* | 10 |                              | 0.95        | 1.19        | 0.65      | 149                    | 183                    | 2.33     | -0.15 |
| DHFR-TS  | 2  |                              | 0.81        | 1.02        | 0.56      | 556                    | 572                    | 2.33     | -0.13 |
| GR       | 7  |                              | 1.00        | 1.16        | 0.50      | 117                    | 178                    | 2.60     | -0.01 |
| Trx      | 1  |                              | 0.91        | 1.00        | 0.64      | 316                    | 374                    | 2.95     | 0.00  |
| GST      | 2  |                              | 0.92        | 1.07        | 0.67      | 227                    | 220                    | 2.20     | 0.01  |
| DHFR-TS  | 7  |                              | 0.89        | 1.11        | 0.61      | 174                    | 246                    | 2.33     | 0.02  |
| DHFR-TS  | 9  |                              | 0.95        | 1.19        | 0.65      | 134                    | 168                    | 2.33     | 0.08  |
| DHFR-TS* | 1  |                              | 0.81        | 1.02        | 0.56      | 599                    | 599                    | 2.33     | 0.11  |
| PK5      | 2  |                              | 0.94        | 1.04        | 0.83      | 281                    | 266                    | 1.90     | 0.13  |
| DHFR-TS* | 5  |                              | 0.93        | 1.16        | 0.86      | 244                    | 281                    | 2.33     | 0.14  |
| TIM      | 3  |                              | 0.81        | 1.01        | 0.69      | 166                    | 286                    | 1.10     | 0.18  |
| TIM      | 2  | inhibitor (2PG)              | 0.92        | 1.14        | 0.92      | 345                    | 375                    | 1.10     | 0.31  |

|          |    |                                 |      |      |      |     |     |      |      |
|----------|----|---------------------------------|------|------|------|-----|-----|------|------|
| PGK      | 3  |                                 | 1.00 | 1.14 | 0.85 | 217 | 313 | 3.00 | 0.32 |
| PDF      | 1  | inhibitors (BRR, BL5)           | 0.94 | 1.11 | 0.88 | 293 | 285 | 2.18 | 0.35 |
| ENR      | 1  | inhibitor (TCC), cofactor       | 0.98 | 1.15 | 0.58 | 862 | 663 | 2.35 | 0.37 |
| Rab6     | 2  |                                 | 1.00 | 1.01 | 0.67 | 153 | 225 | 2.30 | 0.38 |
| KinI     | 5  |                                 | 1.00 | 1.10 | 0.83 | 140 | 192 | 1.60 | 0.43 |
| PGK      | 1  |                                 | 0.92 | 1.04 | 0.83 | 457 | 527 | 3.00 | 0.43 |
| TIM      | 4  |                                 | 0.90 | 1.11 | 0.80 | 115 | 184 | 1.10 | 0.49 |
| DHFR-TS  | 13 |                                 | 0.92 | 1.15 | 0.58 | 115 | 174 | 2.33 | 0.52 |
| Fd       | 2  |                                 | 1.00 | 1.08 | 0.70 | 103 | 149 | 1.70 | 0.53 |
| ALDO     | 11 |                                 | 0.90 | 1.01 | 0.70 | 231 | 372 | 3.00 | 0.58 |
| GR       | 6  |                                 | 1.00 | 1.16 | 0.67 | 123 | 139 | 2.60 | 0.58 |
| DHFR-TS* | 2  | substrate (UMP)                 | 0.98 | 1.22 | 0.93 | 471 | 528 | 2.33 | 0.66 |
| Pfg27    | 2  |                                 | 0.63 | 1.01 | 0.59 | 367 | 389 | 2.10 | 0.72 |
| DHFR-TS  | 5  |                                 | 1.00 | 1.25 | 0.92 | 224 | 266 | 2.33 | 0.75 |
| GR*      | 5  |                                 | 1.00 | 1.16 | 0.80 | 140 | 153 | 2.60 | 0.91 |
| ALDO     | 13 |                                 | 1.00 | 1.12 | 0.83 | 207 | 202 | 3.00 | 0.96 |
| PGK      | 5  |                                 | 0.94 | 1.07 | 0.75 | 170 | 236 | 3.00 | 1.09 |
| KinI     | 4  |                                 | 0.86 | 0.94 | 0.64 | 162 | 213 | 1.60 | 1.10 |
| ALDO     | 12 |                                 | 1.00 | 1.12 | 0.88 | 223 | 247 | 3.00 | 1.15 |
| CyP      | 1  | coinhibitor (CsA)               | 1.00 | 1.10 | 0.92 | 271 | 288 | 2.10 | 1.22 |
| ALDO     | 8  |                                 | 0.80 | 0.89 | 0.60 | 359 | 364 | 3.00 | 1.23 |
| ALDO     | 14 |                                 | 1.00 | 1.12 | 0.83 | 160 | 195 | 3.00 | 1.31 |
| GR       | 5  |                                 | 1.00 | 1.16 | 0.91 | 217 | 262 | 2.60 | 1.36 |
| LDH      | 3  |                                 | 0.75 | 0.80 | 0.75 | 406 | 344 | 1.70 | 1.45 |
| ALDO     | 9  |                                 | 0.90 | 1.01 | 0.85 | 295 | 312 | 3.00 | 1.45 |
| DHFR-TS* | 12 |                                 | 0.83 | 1.04 | 0.50 | 132 | 174 | 2.33 | 1.46 |
| PGK      | 8  |                                 | 0.92 | 1.04 | 0.67 | 148 | 193 | 3.00 | 1.54 |
| Pfg27    | 1  |                                 | 0.57 | 0.92 | 0.64 | 427 | 465 | 2.10 | 1.58 |
| PM2      | 5  |                                 | 0.75 | 1.10 | 0.63 | 104 | 171 | 1.80 | 1.62 |
| KinI     | 6  |                                 | 0.90 | 0.99 | 0.60 | 110 | 118 | 1.60 | 1.62 |
| GST      | 1  | inhibitor (GTX)                 | 1.00 | 1.17 | 0.64 | 789 | 889 | 2.20 | 1.65 |
| DHFR-TS* | 14 |                                 | 0.83 | 1.04 | 0.50 | 124 | 159 | 2.33 | 1.65 |
| TIM      | 5  |                                 | 0.83 | 1.03 | 0.75 | 112 | 128 | 1.10 | 1.66 |
| DHFR-TS  | 3  | substrate (UMP)                 | 1.00 | 1.25 | 0.95 | 380 | 427 | 2.33 | 1.73 |
| PM2      | 2  |                                 | 0.60 | 0.88 | 0.50 | 300 | 320 | 1.80 | 1.73 |
| ALDO     | 15 |                                 | 1.00 | 1.12 | 0.83 | 127 | 168 | 3.00 | 1.76 |
| AdSS     | 5  |                                 | 0.75 | 0.97 | 0.63 | 174 | 210 | 2.00 | 1.81 |
| Trx      | 2  |                                 | 1.00 | 1.10 | 0.80 | 118 | 141 | 2.95 | 1.87 |
| Fd       | 1  |                                 | 0.88 | 0.94 | 0.50 | 107 | 133 | 1.70 | 1.90 |
| DHFR-TS  | 1  | inhibitor (WRA), cofactor (NDP) | 0.95 | 1.19 | 0.76 | 905 | 757 | 2.33 | 1.92 |
| ALDO     | 16 |                                 | 0.92 | 1.02 | 0.58 | 119 | 165 | 3.00 | 1.93 |
| DHFR-TS* | 16 |                                 | 0.83 | 1.04 | 0.50 | 111 | 129 | 2.33 | 2.02 |
| DHFR-TS  | 8  |                                 | 0.81 | 1.02 | 0.75 | 158 | 186 | 2.33 | 2.05 |
| DHFR-TS  | 14 |                                 | 0.81 | 1.02 | 0.50 | 110 | 149 | 2.33 | 2.14 |
| DHFR-TS  | 12 |                                 | 0.80 | 1.00 | 0.50 | 118 | 162 | 2.33 | 2.15 |
| DHFR-TS  | 16 |                                 | 0.83 | 1.04 | 0.50 | 103 | 122 | 2.33 | 2.16 |
| GR*      | 4  |                                 | 0.90 | 1.04 | 0.80 | 151 | 151 | 2.60 | 2.21 |
| DHFR-TS* | 9  |                                 | 0.78 | 0.97 | 0.72 | 173 | 196 | 2.33 | 2.25 |
| PDF      | 2  |                                 | 0.92 | 1.09 | 0.83 | 104 | 129 | 2.18 | 2.31 |
| DHFR-TS* | 11 |                                 | 0.75 | 0.94 | 0.50 | 145 | 205 | 2.33 | 2.32 |
| DHFR-TS  | 10 |                                 | 0.75 | 0.94 | 0.50 | 129 | 191 | 2.33 | 2.54 |
| Pfg27    | 4  |                                 | 0.64 | 1.04 | 0.50 | 124 | 173 | 2.10 | 2.55 |
| PGK      | 4  |                                 | 0.88 | 1.00 | 0.81 | 173 | 178 | 3.00 | 2.72 |

|          |    |                                                 |      |      |      |      |      |      |       |
|----------|----|-------------------------------------------------|------|------|------|------|------|------|-------|
| GR       | 2  | cofactor (FAD)                                  | 0.95 | 1.11 | 0.86 | 841  | 743  | 2.60 | 2.83  |
| PK5      | 4  |                                                 | 0.95 | 1.04 | 0.90 | 122  | 156  | 1.90 | 2.92  |
| Pfg27    | 3  |                                                 | 0.63 | 1.01 | 0.50 | 126  | 148  | 2.10 | 3.04  |
| ENR      | 5  |                                                 | 0.80 | 0.94 | 0.60 | 106  | 129  | 2.35 | 3.13  |
| ENR*     | 5  |                                                 | 0.75 | 0.88 | 0.58 | 129  | 147  | 2.35 | 3.43  |
| ALDO     | 7  |                                                 | 1.00 | 1.12 | 0.95 | 522  | 470  | 3.00 | 3.46  |
| ENR*     | 7  |                                                 | 0.75 | 0.88 | 0.67 | 118  | 164  | 2.35 | 3.54  |
| Pfg27    | 5  |                                                 | 0.64 | 1.04 | 0.79 | 115  | 148  | 2.10 | 3.60  |
| Rab6     | 1  | product (GDP)                                   | 1.00 | 1.01 | 0.95 | 349  | 357  | 2.30 | 3.75  |
| AdSS     | 4  | reaction intermediate (IMO), substrate analogue | 1.00 | 1.29 | 0.96 | 333  | 278  | 2.00 | 3.76  |
| ALDO     | 10 |                                                 | 0.67 | 0.74 | 0.67 | 259  | 231  | 3.00 | 4.09  |
| PGK      | 2  | substrate analogue (AMP)                        | 1.00 | 1.14 | 0.95 | 344  | 328  | 3.00 | 4.19  |
| GR       | 8  |                                                 | 0.75 | 0.87 | 0.75 | 111  | 160  | 2.60 | 4.20  |
| DHFR-TS* | 13 |                                                 | 0.67 | 0.84 | 0.50 | 127  | 129  | 2.33 | 4.27  |
| PGK      | 6  |                                                 | 0.81 | 0.92 | 0.88 | 155  | 201  | 3.00 | 4.28  |
| DHFR-TS* | 15 |                                                 | 0.67 | 0.84 | 0.67 | 121  | 157  | 2.33 | 4.35  |
| DHFR-TS  | 11 |                                                 | 0.67 | 0.84 | 0.50 | 119  | 123  | 2.33 | 4.39  |
| DHFR-TS  | 15 |                                                 | 0.60 | 0.75 | 0.70 | 108  | 147  | 2.33 | 5.60  |
| Pfg27    | 7  |                                                 | 0.50 | 0.81 | 0.50 | 102  | 117  | 2.10 | 5.61  |
| Pfg27    | 6  |                                                 | 0.50 | 0.81 | 0.67 | 107  | 132  | 2.10 | 5.71  |
| PM2      | 4  |                                                 | 0.50 | 0.73 | 0.50 | 105  | 128  | 1.80 | 5.72  |
| GR       | 1  |                                                 | 1.00 | 1.16 | 0.69 | 1284 | 1259 | 2.60 | 15.88 |
| HGXPRT   | 1  |                                                 | 0.77 | 0.96 | 0.63 | 1976 | 2117 | 2.00 | 68.77 |
| GR*      | 1  |                                                 | 0.99 | 1.15 | 0.76 | 2358 | 2320 | 2.60 | 93.20 |
| HGXPRT   | 2  | inhibitor (IRP), substrate analogue             | 1.00 | 1.25 | 1.00 | 385  | 320  | 2.00 | 2889. |
| PK5      | 1  | inhibitor (INR)                                 | 1.00 | 1.10 | 1.00 | 530  | 484  | 1.90 | 2889. |
| KinI     | 3  |                                                 | 1.00 | 1.10 | 1.00 | 206  | 230  | 1.60 | 2890. |
| PGK      | 7  |                                                 | 1.00 | 1.14 | 1.00 | 148  | 168  | 3.00 | 2892. |
| PK5      | 5  |                                                 | 1.00 | 1.10 | 1.00 | 100  | 118  | 1.90 | 2892. |

**Supplementary Table 1.** List of all 133 pockets from the 21 protein structures ranked by drugability score. Starred (\*) protein names indicate pockets in which a cofactor was included in the template structure.
